# Supplementary material for: Differences in Integron Cassette Excision Dynamics Shape a Trade-Off between Evolvability and Genetic Capacitance
Source: PubMed Central journal article supplement (PMC5371416; doi:10.1128/mbio.02296-16), 2017-03-28

**A***Vibrio vulnificus* CMCP6 Chr1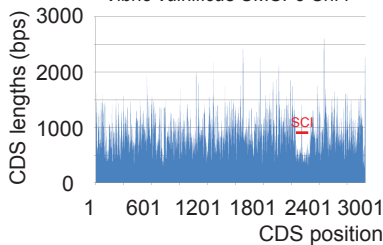**B***Vibrio fischerii* MJ11 Chr2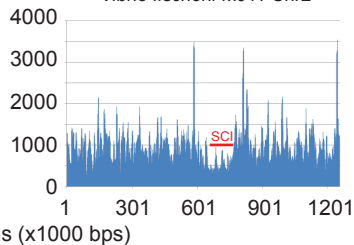**C***Vibrio parahaemolyticus*  
RIMD 2210633 Chr1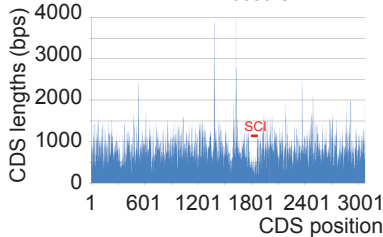**D***Aliivibrio salmonicida*  
LF11238 Chr2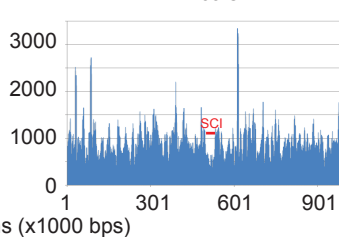**E***Vibrio alginolyticus*  
ATCC 17749 Chr1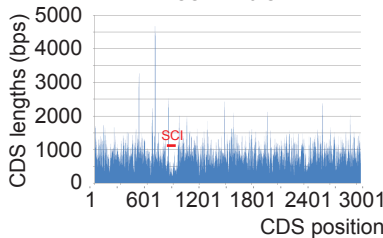**F***Vibrio rotiferanus*  
DAT722 whole genome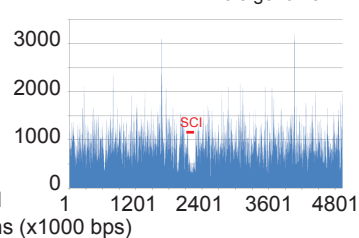

Supplement: mbo002173252sf3.pdf [file mbo002173252sf3.pdf]
