# Supplementary material for: Differences in Integron Cassette Excision Dynamics Shape a Trade-Off between Evolvability and Genetic Capacitance
Source: PubMed Central journal article supplement (PMC5371416; doi:10.1128/mbio.02296-16), 2017-03-28
Supplement: mbo002173252sf6.pdf [file mbo002173252sf6.pdf]

$\Delta G_{bs}$  value of the most stable structure without constraints= -15.5 kcal/mol

$\Delta G_{bs}$  value of the most stable structure with constraints (recombinogenic)= -15.5 kcal/mol

$attC_{bs}$  pfold value calculated with constrained vs. unconstrained folding= 0.30

The most stable structure is the recombinogenic one:

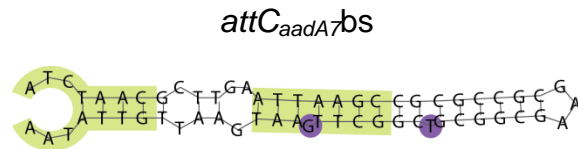

### **VCR<sub>126</sub>**

ts sequence: 5'- ATCTAACAAACGCCTCAAGAGGGACTGTCAACGCGTGGCGTTTCCAGTCCCATTGAGCCG  
CGGTGGTTGCTGTTGTTGTGTTTGTGAGTTTAGTGGTAGTGCGTTGTCAGCCCCTTAGGCGGGCGTTATAC

$\Delta G_{bs}$  value of the most stable structure without constraints= -24.1 kcal/mol

$\Delta G_{bs}$  value of the most stable structure with constraints (recombinogenic)= -16.7 kcal/mol

$attC_{bs}$  pfold value calculated with constrained vs. unconstrained folding=  $1.04 \times 10^{-5}$

The most stable structure is a non-recombinogenic one (improperly folded).

The recombinogenic structure is:

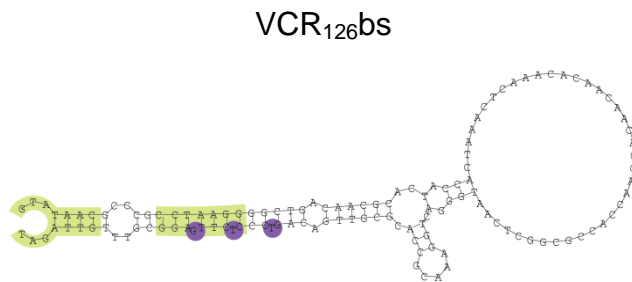

### **VCR<sub>126\*</sub> - VCR<sub>126\*\*</sub> synthetic cassettes**

#### **VCR<sub>126\*</sub>**

ts sequence: 5'- TTATAACAAACGCCTCAAGAGGGACTGTCAACGCGTGGCGTTTCCAGTCCCATTGGCCGC  
GGTGGTTGCTGTTGTTGTGTTTGTGAGTTTAGTGGTAGTGCGTTGTCAGCCCCTTAGGCGGGCGTTAGAT

$\Delta G_{bs}$  value of the most stable structure without constraints= -20.4 kcal/mol

$\Delta G_{bs}$  value of the most stable structure with constraints (recombinogenic)= -16.7 kcal/mol

$attC_{bs}$  pfold value calculated with constrained vs. unconstrained folding=  $3.09 \times 10^{-3}$

The most stable structure is a non-recombinogenic one (improperly folded).

The recombinogenic structure is:

VCR<sub>126</sub>\*bs

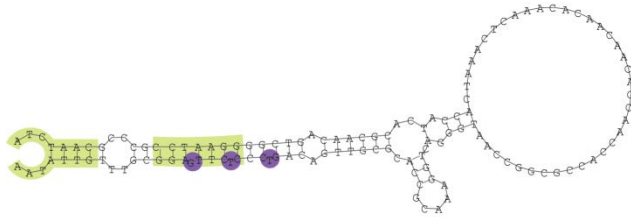

### VCR<sub>126</sub>\*\*

ts sequence: 5'- ATCTAACAAACGCCTCAAGAGGGACTGTCAACGCGTGGCGTTTCCAGTCCCATTGAGCCG

CGGTGGTTGCTGTTGTTGTGTTTGAGTTTAGTGGTAGTGCGTTGTCAGCCCCTTAGGCGGGCGTTATTA

$\Delta G_{bs}$  value of the most stable structure without constraints= -24.1 kcal/mol

$\Delta G_{bs}$  value of the most stable structure with constraints (recombinogenic)= -16.7 kcal/mol

$attC_{bs}$  pfold value calculated with constrained vs. unconstrained folding=  $7.86 \times 10^{-6}$

The most stable structure is a non-recombinogenic one (improperly folded).

The recombinogenic structure is:

VCR<sub>126</sub>\*\*bs

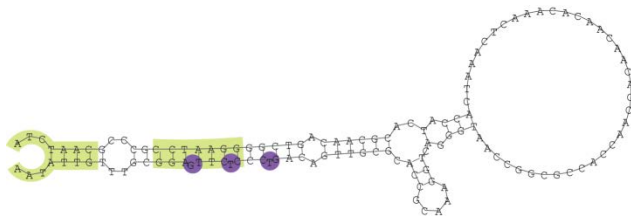

### VCR<sub>16</sub>\*- VCR<sub>64</sub> synthetic cassettes
