# Supplementary material for: Differences in Integron Cassette Excision Dynamics Shape a Trade-Off between Evolvability and Genetic Capacitance
Source: PubMed Central journal article supplement (PMC5371416; doi:10.1128/mbio.02296-16), 2017-03-28
Supplement: mbo002173252st1.pdf [file mbo002173252st1.pdf]

**Table S1A**

| <b><i>Vibrio</i> spp. strains</b>           | <b>NCBI reference sequence</b>       | <b>Integrase gene position</b> | <b>Integrase gene length (bps)</b> |
|---------------------------------------------|--------------------------------------|--------------------------------|------------------------------------|
| <i>Aliivibrio salmonicida</i> LFI1238       | NC_011312<br>NC_011313               | 593499-594482                  | 984_reverse                        |
| <i>Vibrio alginolyticus</i> ATCC 17749      | NC_022349<br>NC_022359               | 1009839-1010801                | 963_forward                        |
| <i>Vibrio cholerae</i> El Tor strain N16961 | NC_002505<br>NC_002506               | 309750-310712                  | 963_reverse                        |
| <i>Vibrio fischerii</i> MJ11                | NC_011184<br>NC_011186               | 817245-818228                  | 984_forward                        |
| <i>Vibrio parahaemolyticus</i> RIMD 2210633 | NC_004603<br>NC_004605               | 1948281-1949243                | 963_forward                        |
| <i>Vibrio rotiferianus</i> DAT722           | NZ_AFAJ000000000<br>NZ_AJZL000000000 | 2363443-2364405                | 936_reverse                        |
| <i>Vibrio vulnificus</i> CMCP6              | NC_004459<br>NC_004460               | 2438314-2439276                | 963_reverse                        |

**Table S1B**

| <b>Basic strains*</b> |                                                                     |                            |
|-----------------------|---------------------------------------------------------------------|----------------------------|
| <b>Strain number</b>  | <b>Relevant <i>Escherichia coli</i> genotypes and description</b>   | <b>References</b>          |
| ω9420                 | <b>III</b> DH5α Δ <i>thyA::erm-pir116</i> ) [Erm <sup>R</sup> ]     | <i>Demarre et al, 2005</i> |
| ω8486                 | <b>MG1655</b> Δ <i>dapA recA269::tn10</i> [Tc <sup>R</sup> ]        | <i>Loot et al, 2014</i>    |
| ω8488                 | ω8486 transformed with p3153 [Tc <sup>R</sup> , Carb <sup>R</sup> ] | <i>Loot et al, 2014</i>    |

| Strain number | Relevant <i>Vibrio cholerae</i> genotype and description | References                     |
|---------------|----------------------------------------------------------|--------------------------------|
| ω8637         | N16961 [Str <sup>R</sup> ]                               | Heidelberg <i>et al</i> , 2000 |

| Derivative MG1655Δ <i>dapA</i> <i>recA269::tn10</i> strains*,**        |                |                                  |                                                      |
|------------------------------------------------------------------------|----------------|----------------------------------|------------------------------------------------------|
| Cassette description                                                   | Plasmid number | Strain number (inserted plasmid) | Strain number (inserted plasmid+ pBAD <i>intII</i> ) |
| <i>attC<sub>aadA7</sub>-60bp-attC<sub>ereA2</sub></i> (attP+)          | pB322          | C188                             | C448                                                 |
| <i>attC<sub>aadA7</sub>-60+400bplacZ-attC<sub>ereA2</sub></i> (attP+)  | pB429          | C189                             | C316                                                 |
| <i>attC<sub>aadA7</sub>-60+750bplacZ-attC<sub>ereA2</sub></i> (attP+)  | pB254          | D004                             | D066                                                 |
| <i>attC<sub>aadA7</sub>-60+1500bplacZ-attC<sub>ereA2</sub></i> (attP+) | pB255          | B552                             | C480                                                 |
| <i>attC<sub>aadA7</sub>-60+3000bplacZ-attC<sub>ereA2</sub></i> (attP+) | pB321          | E109                             | E156                                                 |
| <i>attC<sub>aadA7</sub>-60bp-attC<sub>ereA2</sub></i> (attP-)          | pB256          | C186                             | C318                                                 |
| <i>attC<sub>aadA7</sub>-60+400bplacZ-attC<sub>ereA2</sub></i> (attP-)  | pB428          | B548                             | C319                                                 |
| <i>attC<sub>aadA7</sub>-60+750bplacZ-attC<sub>ereA2</sub></i> (attP-)  | pB257          | D005                             | D067                                                 |
| <i>attC<sub>aadA7</sub>-60+1500bplacZ-attC<sub>ereA2</sub></i> (attP-) | pB253          | E108                             | E154                                                 |
| <i>attC<sub>aadA7</sub>-60+3000bplacZ-attC<sub>ereA2</sub></i> (attP-) | pB252          | B550                             | C437                                                 |
| <i>attC<sub>aadA7</sub>-60+750bphubP-attC<sub>ereA2</sub></i> (attP+)  | pE511          | E906                             | F299                                                 |
| <i>attC<sub>aadA7</sub>-60+1500bphubP-attC<sub>ereA2</sub></i> (attP+) | pE512          | F052                             | F300                                                 |
| <i>attC<sub>aadA7</sub>-60+3000bphubP-attC<sub>ereA2</sub></i> (attP+) | pE513          | E908                             | F301                                                 |
| <i>attC<sub>aadA7</sub>-60bp-VCR<sub>126</sub></i> (attP+)             | pA621          | D098                             | D115                                                 |

|                                                                     |       |      |      |
|---------------------------------------------------------------------|-------|------|------|
| <i>attC<sub>aadA7</sub>-60+400bplacZ-VCR<sub>126</sub></i> (attP+)  | pB332 | E288 | E297 |
| <i>attC<sub>aadA7</sub>-60+750bplacZ-VCR<sub>126</sub></i> (attP+)  | pA696 | E291 | E300 |
| <i>attC<sub>aadA7</sub>-60+1500bplacZ-VCR<sub>126</sub></i> (attP+) | pA703 | B547 | C449 |
| <i>attC<sub>aadA7</sub>-60+3000bplacZ-VCR<sub>126</sub></i> (attP+) | pA705 | C185 | C310 |
| <i>attC<sub>aadA7</sub>-60bp-VCR<sub>126</sub></i> (attP-)          | pA672 | E189 | E310 |
| <i>attC<sub>aadA7</sub>-60+400bplacZ-VCR<sub>126</sub></i> (attP-)  | pB331 | B541 | C312 |
| <i>attC<sub>aadA7</sub>-60+750bplacZ-VCR<sub>126</sub></i> (attP-)  | pA669 | E195 | E316 |
| <i>attC<sub>aadA7</sub>-60+1500bplacZ-VCR<sub>126</sub></i> (attP-) | pA675 | E187 | E308 |
| <i>attC<sub>aadA7</sub>-60+3000bplacZ-VCR<sub>126</sub></i> (attP-) | pA670 | B544 | C315 |
| <i>attC<sub>aadA7</sub>-60+750bphubP-VCR<sub>126</sub></i> (attP+)  | pE507 | E902 | F302 |
| <i>attC<sub>aadA7</sub>-60+1500bphubP-VCR<sub>126</sub></i> (attP+) | pE508 | E903 | F303 |
| <i>attC<sub>aadA7</sub>-60+3000bphubP-VCR<sub>126</sub></i> (attP+) | pE509 | E904 | F304 |
| <i>attC<sub>aadA7</sub>-60+750bphubP-VCR<sub>126</sub></i> (attP-)  | pE503 | E898 | F305 |
| <i>attC<sub>aadA7</sub>-60+1500bphubP-VCR<sub>126</sub></i> (attP-) | pE504 | E899 | F306 |
| <i>attC<sub>aadA7</sub>-60+3000bphubP-VCR<sub>126</sub></i> (attP-) | pE505 | F045 | F307 |
| VCR <sub>16*</sub> -60bp-VCR <sub>64</sub> (attP+)                  | pA702 | D087 | D107 |
| VCR <sub>16*</sub> -60+400bplacZ-VCR <sub>64</sub> (attP+)          | pB328 | D090 | D110 |
| VCR <sub>16*</sub> -60+750bplacZ-VCR <sub>64</sub> (attP+)          | pA717 | D088 | D108 |
| VCR <sub>16*</sub> -60+1500bplacZ-VCR <sub>64</sub> (attP+)         | pA701 | D094 | D114 |
| VCR <sub>16*</sub> -60+3000bplacZ-VCR <sub>64</sub> (attP+)         | pA697 | D093 | D113 |
| VCR <sub>16*</sub> -60bp-VCR <sub>64</sub> (attP-)                  | pA671 | D086 | D106 |
| VCR <sub>16*</sub> -60+400bplacZ-VCR <sub>64</sub> (attP-)          | pB327 | D089 | D109 |
| VCR <sub>16*</sub> -60+750bplacZ-VCR <sub>64</sub> (attP-)          | pA667 | D085 | D105 |

|                                                                          |       |      |      |
|--------------------------------------------------------------------------|-------|------|------|
| VCR <sub>16*</sub> -60+ <b>1500bplacZ</b> -VCR <sub>64</sub> (attP-)     | pA673 | D092 | D112 |
| VCR <sub>16*</sub> -60+ <b>3000bplacZ</b> -VCR <sub>64</sub> (attP-)     | pA663 | D091 | D111 |
| VCR <sub>126*</sub> -60bp-VCR <sub>126**</sub> (attP+)                   | pE894 | F059 | F294 |
| VCR <sub>126*</sub> -60+ <b>400bplacZ</b> -VCR <sub>126**</sub> (attP+)  | pE978 | F060 | F295 |
| VCR <sub>126*</sub> -60+ <b>750bplacZ</b> -VCR <sub>126**</sub> (attP+)  | pF308 | F155 | F296 |
| VCR <sub>126*</sub> -60+ <b>1500bplacZ</b> -VCR <sub>126**</sub> (attP+) | pE980 | F062 | F297 |
| VCR <sub>126*</sub> -60+ <b>3000bplacZ</b> -VCR <sub>126**</sub> (attP+) | pE922 | F063 | F298 |
| VCR <sub>126*</sub> -60bp-VCR <sub>126**</sub> (attP-)                   | pE893 | F054 | F289 |
| VCR <sub>126*</sub> -60+ <b>400bplacZ</b> -VCR <sub>126**</sub> (attP-)  | pE975 | F055 | F290 |
| VCR <sub>126*</sub> -60+ <b>750bplacZ</b> -VCR <sub>126**</sub> (attP-)  | pF309 | F156 | F291 |
| VCR <sub>126*</sub> -60+ <b>1500bplacZ</b> -VCR <sub>126**</sub> (attP-) | pE977 | F057 | F292 |
| VCR <sub>126*</sub> -60+ <b>3000bplacZ</b> -VCR <sub>126**</sub> (attP-) | pE921 | F058 | F293 |

\**Escherichia coli* and *Vibrio cholerae* strains were grown in Luria Bertani (LB) broth at 37°C or 30°C (when specified). Antibiotics were used at the following concentrations: carbenicillin (Carb), 100 µg/ml, spectinomycin (Sp), 40 µg/ml, erythromycin (Erm), 200 µg/ml, tetracyclin (Tet), 15 µg/ml, streptomycin (Str), 200 µg/ml, kanamycin (Kan), 25 µg/ml, Thymidine (Thy) and diaminopimelic acid (DAP) were supplemented when necessary to a final concentration of 0.3mM. To induce the P<sub>bad</sub> promoter, L-arabinose (Ara) was added to a final concentration of 2mg/ml; to repress it, glucose (Glc) was added to a final concentration of 10mg/ml. To induce the P<sub>lac</sub> promoter, isopropyl-β-D-thiogalactopyranoside (IPTG) was added to a final concentration of 200µg/ml.

\*\*All the constructed pSW derivative plasmids were inserted into the λ attB site of the ω8488

chromosome through lambda recombination mediated by plasmid pTSA29-CXI (p3153, Carb<sup>R</sup>, Valens & al., 2004). By inverting the *attP* site on the pSW plasmid, we inserted plasmids in both orientations: attP<sup>-</sup> corresponding to the bottom strand of *attC* sites carried by the lagging strand template, and attP<sup>+</sup> to the bottom strand carried by the leading strand template. We confirmed plasmid insertions by performing PCR reactions with o1897/o1898 (presence of a monomeric inserted plasmid) and o361/o3725 (plasmid insertion in *attB* site) primers. We performed all the experiments in *recA* deleted strains to avoid homologous recombination between the *lacZ* fragment in the synthetic cassettes and the endogenous *lacZ* gene, as well as between *attC* sites having high degree of identity (i.e: VCR sites).

**Table S1C**

| <b>Plasmids used in this study*</b>                                                                                                |                       |                                                                                  |
|------------------------------------------------------------------------------------------------------------------------------------|-----------------------|----------------------------------------------------------------------------------|
| <b>Plasmid name and description</b>                                                                                                | <b>Plasmid number</b> | <b>References</b>                                                                |
| pBADIntI1, ori <sub>ColE1</sub> , [Carb <sup>R</sup> ]                                                                             | p3938                 | Demarre <i>et al</i> , 2007                                                      |
| pTSA29-CXI, ori <sub>pSC101</sub> , [Carb <sup>R</sup> ]                                                                           | p3153                 | Valens <i>et al</i> , 2004                                                       |
| pSW23T, ori <sub>R6K</sub> , [Sp <sup>R</sup> ]                                                                                    | p7988                 | Laboratory collection                                                            |
| pSU38Δ:: <i>lacZ</i> :: <i>attC</i> <sub>aadA7-catT4t</sub> -VCR <sub>2</sub> ,<br><i>ori</i> <sub>p15A</sub> , [Kan] <sup>R</sup> | p1372                 | Demarre <i>et al</i> , 2007                                                      |
| pRS551, ori <sub>pMB1</sub> , [Carb <sup>R</sup> , Kan <sup>R</sup> ]                                                              | p923                  | Simons <i>et al</i> , 1987                                                       |
| pSWattI- <i>attC</i> <sub>aadA7-dapA</sub> , [Cm <sup>R</sup> ]                                                                    | p7923                 | Baharoglu <i>et al</i> , 2010                                                    |
| pMA-VCR <sub>126*</sub> -term, ori <sub>ColE1</sub> , [Carb <sup>R</sup> ]                                                         | p8208                 | VCR <sub>126*</sub> -term GeneArt fragment (see Table III)<br><br>in pMA plasmid |

|                                                                                        |       |                                                                                                                                                                                        |
|----------------------------------------------------------------------------------------|-------|----------------------------------------------------------------------------------------------------------------------------------------------------------------------------------------|
| pTOPO-VCR <sub>16*</sub> -VCR <sub>64</sub> , ori <sub>PUC</sub> , [Kan <sup>R</sup> ] | pE884 | <b>VCR<sub>16*</sub>-VCR<sub>64</sub> gBlocks<sup>®</sup> Gene Fragment from Integrated DNA Technologies (see Table III) in pCR<sup>™</sup>-Blunt II-TOPO<sup>R</sup> (Invitrogen)</b> |
|----------------------------------------------------------------------------------------|-------|----------------------------------------------------------------------------------------------------------------------------------------------------------------------------------------|

| <b>Derivative pSW plasmids constructed in this study</b>  |                       |                                                                                                                                                                                                                                           |
|-----------------------------------------------------------|-----------------------|-------------------------------------------------------------------------------------------------------------------------------------------------------------------------------------------------------------------------------------------|
| <b>Plasmid name and description</b>                       | <b>Plasmid number</b> | <b>Relevant properties and construction</b>                                                                                                                                                                                               |
| pSW23T, ori <sub>R6K</sub> , [Sp <sup>R</sup> ]           |                       |                                                                                                                                                                                                                                           |
| pSWattC <sub>aadA7</sub> -VCR <sub>126</sub> (attP+)      | p8146                 | <b>Plac-attC<sub>aadA7</sub></b> fragment (amplification of p1372 using o299 and o845 followed by EcoRI/BamHI digestion) and <b>VCR<sub>126</sub></b> fragment (annealing between o876, o877, o878 and o879) in EcoRI/XmaI digested p7988 |
| pSWattC <sub>aadA7</sub> -VCR <sub>126**</sub> (attP+)    | p8159                 | <b>attC<sub>aadA7</sub></b> fragment (p8146 digested by EcoRI/BglII) and <b>VCR<sub>126**</sub></b> fragment (annealing between o885 and o886) in EcoRI/XmaI digested p7988                                                               |
| pSWattC <sub>aadA7</sub> -60bp-VCR <sub>126</sub> (attP+) | p8161                 | <b>Terminator</b> fragment (annealing between o883 and o884) in BamHI digested p8146                                                                                                                                                      |
| pSWVCR <sub>126*</sub> -60bp-VCR <sub>126**</sub> (attP+) | p8241                 | <b>VCR<sub>126*-term</sub></b> fragment (XbaI/BglII digested p8208) in XbaI/BamHI digested p8159                                                                                                                                          |
| pSWattC <sub>aadA7</sub> -60bp-VCR <sub>126</sub> (attP-) | p8257                 | Inversion of the <b>attP</b> region of p8161 by SacI                                                                                                                                                                                      |

|                                                                                |       | digestion                                                                                        |
|--------------------------------------------------------------------------------|-------|--------------------------------------------------------------------------------------------------|
| pSWVCR <sub>126*</sub> -60bp-VCR <sub>126**</sub> (attP-)                      | p8256 | Inversion of the <b>attP</b> region of p8241 by SacI digestion                                   |
| pSWattC <sub>aadA7</sub> -60+ <b>3000bplacZ</b> -VCR <sub>126</sub><br>(attP+) | p8238 | <b>3000bplacZ</b> fragment (PCR fragment (o863 and o864) from p923)) in BamHI digested p8161     |
| pSWVCR <sub>126*</sub> -60+ <b>3000bplacZ</b> -VCR <sub>126**</sub><br>(attP+) | p8265 | <b>3000bplacZ</b> fragment in BamHI digested p8241                                               |
| pSWattC <sub>aadA7</sub> -60+ <b>3000bplacZ</b> -VCR <sub>126</sub><br>(attP-) | p8300 | <b>3000bplacZ</b> fragment in BamHI digested p8257                                               |
| pSWVCR <sub>126*</sub> -60+ <b>3000bplacZ</b> -VCR <sub>126**</sub><br>(attP-) | p8298 | <b>3000bplacZ</b> fragment in BamHI digested p8256                                               |
| pSWattC <sub>aadA7</sub> -60+ <b>750bplacZ</b> -VCR <sub>126</sub><br>(attP+)  | p8255 | <b>750bplacZ</b> fragment (PCR fragment (o863 and o868) from p923)) in BamHI/NheI digested p8238 |
| pSWVCR <sub>126*</sub> -60+ <b>750bplacZ</b> -VCR <sub>126**</sub><br>(attP+)  | p8338 | <b>750bplacZ</b> fragment in BamHI/NheI digested p8265                                           |
| pSWattC <sub>aadA7</sub> -60+ <b>750bplacZ</b> -VCR <sub>126</sub><br>(attP-)  | p8341 | <b>750bplacZ</b> fragment in BamHI/NheI digested p8300                                           |
| pSWVCR <sub>126*</sub> -60+ <b>750bplacZ</b> -VCR <sub>126**</sub><br>(attP-)  | p8339 | <b>750bplacZ</b> fragment in BamHI/NheI digested p8298                                           |
| pSWattC <sub>aadA7</sub> -60bp-VCR <sub>126</sub> (attP+)                      | p9935 | <b>dapA</b> fragment (PCR fragment (o1069 and 1070) from p7923) in SmaI/PstI digested p8161      |
| pSWVCR <sub>126*</sub> -60bp-VCR <sub>126**</sub> (attP+)                      | p9936 | <b>dapA</b> fragment in SmaI/PstI digested p8241                                                 |

|                                                                     |       |                                                                                                      |
|---------------------------------------------------------------------|-------|------------------------------------------------------------------------------------------------------|
| pSWattC <sub>aadA7-60bp-VCR<sub>126</sub></sub> (attP-)             | p9938 | <i>dapA</i> fragment in SmaI/PstI digested p8257                                                     |
| pSWVCR <sub>126*-60bp-VCR<sub>126**</sub></sub> (attP-)             | p9937 | <i>dapA</i> fragment in SmaI/PstI digested p8256                                                     |
| pSWattC <sub>aadA7-60+3000bplacZ-VCR<sub>126</sub></sub><br>(attP+) | p8456 | <i>dapA</i> fragment in SmaI/PstI digested p8238                                                     |
| pSWVCR <sub>126*-60+3000bplacZ-VCR<sub>126**</sub></sub><br>(attP+) | p8459 | <i>dapA</i> fragment in SmaI/PstI digested p8265                                                     |
| pSWattC <sub>aadA7-60+3000bplacZ-VCR<sub>126</sub></sub><br>(attP-) | p8469 | <i>dapA</i> fragment in SmaI/PstI digested p8300                                                     |
| pSWVCR <sub>126*-60+3000bplacZ-VCR<sub>126**</sub></sub><br>(attP-) | p8467 | <i>dapA</i> fragment in SmaI/PstI digested p8298                                                     |
| pSWattC <sub>aadA7-60+750bplacZ-VCR<sub>126</sub></sub><br>(attP+)  | p8458 | <i>dapA</i> fragment in SmaI/PstI digested p8255                                                     |
| pSWVCR <sub>126*-60+750bplacZ-VCR<sub>126**</sub></sub><br>(attP+)  | p8460 | <i>dapA</i> fragment in SmaI/PstI digested p8338                                                     |
| pSWattC <sub>aadA7-60+750bplacZ-VCR<sub>126</sub></sub><br>(attP-)  | p8463 | <i>dapA</i> fragment in SmaI/PstI digested p8341                                                     |
| pSWVCR <sub>126*-60+750bplacZ-VCR<sub>126**</sub></sub><br>(attP-)  | p8461 | <i>dapA</i> fragment in SmaI/PstI digested p8339                                                     |
| pSWattC <sub>aadA7-60+1500bplacZ-VCR<sub>126</sub></sub><br>(attP+) | pA350 | <b>1500bplacZ</b> fragment (PCR fragment (o863 and o866) from p923)) in BamHI/NheI digested<br>p8458 |
| pSWVCR <sub>126*-60+1500bplacZ-VCR<sub>126**</sub></sub><br>(attP+) | pA351 | <b>1500bplacZ</b> fragment in BamHI/NheI digested<br>p8460                                           |



|                                                                                |       |                                                                                         |
|--------------------------------------------------------------------------------|-------|-----------------------------------------------------------------------------------------|
| pSWattC <sub>aadA7</sub> -60+ <b>1500bplacZ</b> -VCR <sub>126</sub><br>(attP-) | pA354 | <b>1500bplacZ</b> fragment in BamHI/NheI digested<br>p8463                              |
| pSWVCR <sub>126*</sub> -60+ <b>1500bplacZ</b> -VCR <sub>126**</sub><br>(attP-) | pA352 | <b>1500bplacZ</b> fragment in BamHI/NheI digested<br>p8461                              |
| pSWattC <sub>aadA7</sub> -60bp-VCR <sub>126</sub> (attP+)                      | pA621 | <b>FRT</b> fragment (annealing between o2227 and<br>o2228) in NotI/EcoRI digested p9935 |
| pSWVCR <sub>126*</sub> -60bp-VCR <sub>126**</sub> (attP+)                      | pA702 | <b>FRT</b> fragment in NotI/EcoRI digested p9936                                        |
| pSWattC <sub>aadA7</sub> -60bp-VCR <sub>126</sub> (attP-)                      | pA672 | <b>FRT</b> fragment in NotI/EcoRI digested p9938                                        |
| pSWVCR <sub>126*</sub> -60bp-VCR <sub>126**</sub> (attP-)                      | pA671 | <b>FRT</b> fragment in NotI/EcoRI digested p9937                                        |
| pSWattC <sub>aadA7</sub> -60+ <b>3000bplacZ</b> -VCR <sub>126</sub><br>(attP+) | pA705 | <b>FRT</b> fragment in NotI/EcoRI digested p8456                                        |
| pSWVCR <sub>126*</sub> -60+ <b>3000bplacZ</b> -VCR <sub>126**</sub><br>(attP+) | pA697 | <b>FRT</b> fragment in NotI/EcoRI digested p8459                                        |
| pSWattC <sub>aadA7</sub> -60+ <b>3000bplacZ</b> -VCR <sub>126</sub><br>(attP-) | pA670 | <b>FRT</b> fragment in NotI/EcoRI digested p8469                                        |
| pSWVCR <sub>126*</sub> -60+ <b>3000bplacZ</b> -VCR <sub>126**</sub><br>(attP-) | pA663 | <b>FRT</b> fragment in NotI/EcoRI digested p8467                                        |
| pSWattC <sub>aadA7</sub> -60+ <b>750bplacZ</b> -VCR <sub>126</sub><br>(attP+)  | pA696 | <b>FRT</b> fragment in NotI/EcoRI digested p8458                                        |
| pSWVCR <sub>126*</sub> -60+ <b>750bplacZ</b> -VCR <sub>126**</sub><br>(attP+)  | pA717 | <b>FRT</b> fragment in NotI/EcoRI digested p8460                                        |
| pSWattC <sub>aadA7</sub> -60+ <b>750bplacZ</b> -VCR <sub>126</sub><br>(attP-)  | pA669 | <b>FRT</b> fragment in NotI/EcoRI digested p8463                                        |

|                                                                                    |       |                                                                                                                           |
|------------------------------------------------------------------------------------|-------|---------------------------------------------------------------------------------------------------------------------------|
| pSWVCR <sub>126*</sub> -60+ <b>750bplacZ</b> -VCR <sub>126**</sub><br>(attP-)      | pA667 | <b>FRT</b> fragment in NotI/EcoRI digested p8461                                                                          |
| pSWattC <sub>aadA7</sub> -60+ <b>1500bplacZ</b> -VCR <sub>126</sub><br>(attP+)     | pA703 | <b>FRT</b> fragment in NotI/EcoRI digested pA350                                                                          |
| pSWVCR <sub>126*</sub> -60+ <b>1500bplacZ</b> -VCR <sub>126**</sub><br>(attP+)     | pA701 | <b>FRT</b> fragment in NotI/EcoRI digested pA351                                                                          |
| pSWattC <sub>aadA7</sub> -60+ <b>1500bplacZ</b> -VCR <sub>126</sub><br>(attP-)     | pA675 | <b>FRT</b> fragment in NotI/EcoRI digested pA354                                                                          |
| pSWVCR <sub>126*</sub> -60+ <b>1500bplacZ</b> -VCR <sub>126**</sub><br>(attP-)     | pA673 | <b>FRT</b> fragment in NotI/EcoRI digested pA352                                                                          |
| pSWattC <sub>aadA7</sub> -60bp-attC <sub>ereA2</sub> (attP+)                       | pB322 | <b>attC<sub>ereA2</sub></b> fragment (annealing between o2351,<br>o2352, o2353 and o2354) in BamHI/SmaI<br>digested pA621 |
| pSWattC <sub>aadA7</sub> -60bp-attC <sub>ereA2</sub> (attP-)                       | pB256 | <b>attC<sub>ereA2</sub></b> fragment in BamHI/SmaI digested<br>pA672                                                      |
| pSWattC <sub>aadA7</sub> -60+ <b>3000bplacZ</b> - attC <sub>ereA2</sub><br>(attP+) | pB321 | <b>attC<sub>ereA2</sub></b> fragment in BamHI/SmaI digested<br>pA705                                                      |
| pSWattC <sub>aadA7</sub> -60+ <b>3000bplacZ</b> - attC <sub>ereA2</sub><br>(attP-) | pB252 | <b>attC<sub>ereA2</sub></b> fragment in BamHI/SmaI digested<br>pA670                                                      |
| pSWattC <sub>aadA7</sub> -60+ <b>750bplacZ</b> - attC <sub>ereA2</sub><br>(attP+)  | pB254 | <b>attC<sub>ereA2</sub></b> fragment in BamHI/SmaI digested<br>pA696                                                      |
| pSWattC <sub>aadA7</sub> -60+ <b>750bplacZ</b> - attC <sub>ereA2</sub><br>(attP-)  | pB257 | <b>attC<sub>ereA2</sub></b> fragment in BamHI/SmaI digested<br>pA669                                                      |

|                                                                                    |       |                                                                                                                                                                       |
|------------------------------------------------------------------------------------|-------|-----------------------------------------------------------------------------------------------------------------------------------------------------------------------|
| pSWattC <sub>aadA7-60</sub> + <b>1500bplacZ</b> - attC <sub>ereA2</sub><br>(attP+) | pB255 | attC <sub>ereA2</sub> fragment in BamHI/SmaI digested<br>pA703                                                                                                        |
| pSWattC <sub>aadA7-60</sub> + <b>1500bplacZ</b> - attC <sub>ereA2</sub><br>(attP-) | pB253 | attC <sub>ereA2</sub> fragment in BamHI/SmaI digested<br>pA675                                                                                                        |
| pSWattC <sub>aadA7-60</sub> + <b>400bplacZ</b> -VCR <sub>126</sub><br>(attP+)      | pB332 | <b>400bplacZ</b> fragment (PCR fragment (o863 and<br>o870) from p923)) in BamHI/NheI digested<br>pA696                                                                |
| pSWVCR <sub>126*-60</sub> + <b>400bplacZ</b> -VCR <sub>126**</sub><br>(attP+)      | pB328 | <b>400bplacZ</b> fragment in BamHI/NheI digested<br>pA717                                                                                                             |
| pSWattC <sub>aadA7-60</sub> + <b>400bplacZ</b> - attC <sub>ereA2</sub><br>(attP+)  | pB429 | <b>400bplacZ</b> fragment in BamHI/SmaI digested<br>pB254                                                                                                             |
| pSWVCR <sub>126*-60</sub> + <b>400bplacZ</b> -VCR <sub>126**</sub><br>(attP-)      | pB327 | <b>400bplacZ</b> fragment in BamHI/NheI digested<br>pA667                                                                                                             |
| pSWattC <sub>aadA7-60</sub> + <b>400bplacZ</b> -VCR <sub>126</sub><br>(attP-)      | pB331 | <b>400bplacZ</b> fragment in BamHI/NheI digested<br>pA669                                                                                                             |
| pSWattC <sub>aadA7-60</sub> + <b>400bplacZ</b> - attC <sub>ereA2</sub><br>(attP-)  | pB428 | <b>400bplacZ</b> fragment in BamHI/SmaI digested<br>pB257                                                                                                             |
| pSWattC <sub>aadA7-60</sub> + <b>750bphubP</b> - attC <sub>ereA2</sub><br>(attP+)  | pE511 | <b>750bphubP</b> fragment (PCR fragment (o3771<br>and o3773) from N16961 <i>Vibrio cholerae</i><br>(Heidelberg <i>et al</i> , 2000))) in BamHI/NheI<br>digested pB255 |
| pSWattC <sub>aadA7-60</sub> + <b>750bphubP</b> - VCR <sub>126</sub><br>(attP+)     | pE507 | <b>750bphubP</b> fragment in BamHI/NheI digested<br>pA703                                                                                                             |

|                                                                                    |       |                                                                                                                                                                        |
|------------------------------------------------------------------------------------|-------|------------------------------------------------------------------------------------------------------------------------------------------------------------------------|
| pSWattC <sub>aadA7-60</sub> + <b>750bphubP</b> - VCR <sub>126</sub><br>(attP-)     | pE503 | <b>750bphubP</b> fragment in BamHI/NheI digested<br>pA675                                                                                                              |
| pSWattC <sub>aadA7-60</sub> + <b>1500bphubP</b> - attC <sub>ereA2</sub><br>(attP+) | pE512 | <b>1500bphubP</b> fragment (PCR fragment (o3771<br>and o3774) from N16961 <i>Vibrio cholerae</i><br>(Heidelberg <i>et al</i> , 2000))) in BamHI/NheI<br>digested pB255 |
| pSWattC <sub>aadA7-60</sub> + <b>1500bphubP</b> - VCR <sub>126</sub><br>(attP+)    | pE508 | <b>1500bphubP</b> fragment in BamHI/NheI digested<br>pA703                                                                                                             |
| pSWattC <sub>aadA7-60</sub> + <b>1500bphubP</b> - VCR <sub>126</sub><br>(attP-)    | pE504 | <b>1500bphubP</b> fragment in BamHI/NheI digested<br>pA675                                                                                                             |
| pSWattC <sub>aadA7-60</sub> + <b>3000bphubP</b> - attC <sub>ereA2</sub><br>(attP+) | pE513 | <b>3000bphubP</b> fragment (PCR fragment (o3771<br>and o3830) from N16961 <i>Vibrio cholerae</i><br>(Heidelberg <i>et al</i> , 2000))) in BamHI/NheI<br>digested pB255 |
| pSWattC <sub>aadA7-60</sub> + <b>3000bphubP</b> - VCR <sub>126</sub><br>(attP+)    | pE509 | <b>3000bphubP</b> fragment in BamHI/NheI digested<br>pA703                                                                                                             |
| pSWattC <sub>aadA7-60</sub> + <b>3000bphubP</b> - VCR <sub>126</sub><br>(attP-)    | pE505 | <b>3000bphubP</b> fragment in BamHI/NheI digested<br>pA675                                                                                                             |
| pSWVCR <sub>16*-60</sub> -VCR <sub>64</sub> (attP+)                                | pE894 | <b>VCR<sub>16*-60</sub>-VCR<sub>64</sub></b> fragment (synthetic fragment) in<br>NotI/NruI digested pA717                                                              |
| pSWVCR <sub>16*-60</sub> -VCR <sub>64</sub> (attP-)                                | pE893 | <b>VCR<sub>16*-60</sub>-VCR<sub>64</sub></b> fragment in NotI/EcoRI<br>digested pA667                                                                                  |
| pSWVCR <sub>16*-60</sub> + <b>3000bplacZ</b> - VCR <sub>64</sub>                   | pE922 | <b>3000bplacZ</b> fragment in BamHI digested pE894                                                                                                                     |

|                                                                             |       |                                                    |
|-----------------------------------------------------------------------------|-------|----------------------------------------------------|
| (attP+)                                                                     |       |                                                    |
| pSWVCR <sub>16</sub> *-60+ <b>3000bplacZ</b> - VCR <sub>64</sub><br>(attP-) | pE921 | <b>3000bplacZ</b> fragment in BamHI digested pE893 |
| pSWVCR <sub>16</sub> *-60+ <b>400bplacZ</b> - VCR <sub>64</sub><br>(attP+)  | pE978 | <b>400bplacZ</b> fragment in BamHI digested pE922  |
| pSWVCR <sub>16</sub> *-60+ <b>750bplacZ</b> - VCR <sub>64</sub><br>(attP+)  | pE979 | <b>750bplacZ</b> fragment in BamHI digested pE922  |
| pSWVCR <sub>16</sub> *-60+ <b>1500bplacZ</b> - VCR <sub>64</sub><br>(attP+) | pE980 | <b>1500bplacZ</b> fragment in BamHI digested pE922 |
| pSWVCR <sub>16</sub> *-60+ <b>400bplacZ</b> - VCR <sub>64</sub><br>(attP-)  | pE975 | <b>400bplacZ</b> fragment in BamHI digested pE921  |
| pSWVCR <sub>16</sub> *-60+ <b>750bplacZ</b> - VCR <sub>64</sub><br>(attP-)  | pE976 | <b>750bplacZ</b> fragment in BamHI digested pE921  |
| pSWVCR <sub>16</sub> *-60+ <b>1500bplacZ</b> - VCR <sub>64</sub><br>(attP-) | pE977 | <b>1500bplacZ</b> fragment in BamHI digested pE921 |

\* pSW plasmids were constructed in the II1 strain growing with Thy supplemented in the medium. We confirmed plasmid constructions by performing PCR reactions and sequencing using o1897 and o1962 primers.

**Table S1D**

|                                    |
|------------------------------------|
| <b>Primers used in this study*</b> |
|------------------------------------|

| <b>Primer name</b> | <b>Primer number</b> | <b>Sequences</b>                                                                                  |
|--------------------|----------------------|---------------------------------------------------------------------------------------------------|
| RecReportF         | o299                 | TTTGAATTCGCGGCCGCTTCTAGAGTGAGCGCAACGCAATTAA<br>TG                                                 |
| BamHIattCR         | o845                 | AGTGGATCCCATCTAACGCTTGAATTAAGCCGCGC                                                               |
| 5'BamHI-VCR-XmaI-1 | o876                 | GATCCCATCTAACAAACGCCTCAAGAGGGACTGTCAACGCGTG<br>GCGTTTCCAGTCCCATTGAGC                              |
| 5'BamHI-VCR-XmaI-2 | o877                 | CGCGGTGGTTGCTGTTGTTGTGTTTGTAGTTTAGTGGTAGTGCG<br>TTGTCAGCCCCTTAGGCGGGCGTTATAC                      |
| 3'BamHI-VCR-XmaI-1 | o878                 | GAAACGCCACGCGTTGACAGTCCCTCTTGAGGCGTTTGTTAGA<br>TGG                                                |
| 3'BamHI-VCR-XmaI-2 | o879                 | CCGGGTATAACGCCCGCCTAAGGGGCTGACAACGCACTACCAC<br>TAAACTCAAACACAACAACAGCAACCACCGCGGCTCAATGGGA<br>CTG |
| 5term              | o883                 | GATCCAAAAAAAAAACCCTGACAGGGCGGGGTTTTTTTT<br>TA                                                     |
| 3term              | o884                 | GATCTAAAAAAAAAACCCTGTCAGGGGCGGGGTTTTTTTT<br>TG                                                    |
| modiVCR2-F         | o885                 | AGGCGGGCGTTATTAC                                                                                  |
| modiVCR2-R         | o886                 | CCGGGTAATAACGCCCGCCTAAG                                                                           |
| 5'BamHI-LacZ       | o863                 | CGGGGATCCATGACCATGATTACGGATTCACTGG                                                                |

|                       |       |                                                                    |
|-----------------------|-------|--------------------------------------------------------------------|
| 3'NheI-BgLI-LacZ-3000 | o864  | GGCAGATCTGCTAGCCCAGGAGTCGTCGCCACCAATCC                             |
| 3'NheI-LacZ-1500      | o866  | GGCGCTAGCAATAATATCGGTGGCCGTGGTGTCTG                                |
| 3'NheI-LacZ-750       | o868  | GGCGCTAGCCTCGCCGCACATCTGAACTTCAGC                                  |
| 3'NheI-LacZ-400       | o870  | GGCGCTAGCAGCTTTCATCAACATTAAATGTGAGC                                |
| XmaI-dapA-F           | o1069 | TTTCCCGGGTACTTCACGGGAAGTATTGT                                      |
| PstI-dapA-R           | o1070 | CGGCTGCAGTTACAGCAAACCGGCATGCT                                      |
| EcoRI-FRT-NotI        | o2227 | AATTCGAAGTTCCTATACTtttctagaGAATAGGAACTTCGGAATAGG<br>AACTTCGC       |
| NotI-FRT-EcoRI        | o2228 | GGCCGCGAAGTTCCTATTCCGAAGTTCCTATTCTctagaaaGTATAG<br>GAACTTCG        |
| 5BamHIereA2           | o2351 | GATCCAAAAAAAAAACCCCGCCCCTGACAGGGCGGGGTTTTTTTT<br>TAGATCCCATCTAACC  |
| 5ereA2SmaI            | o2352 | TGCCAATCCACCGGACGGTTTTTCAACCGCCGGTGATCAGCGCG<br>TTATACCC           |
| 3ereA2SmaI            | o2353 | GGGTATAACGCGCTGATCACCGGCGGTTGAAAACCGTCCGGTG<br>GATTGGCAGGTTAGATGGG |
| 3BamHIereA2           | o2354 | ATCTAAAAAAAAAACCCCGCCCCTGTCAGGGGCGGGGTTTTTTTTT                     |

|                           |          |                                                                                                 |
|---------------------------|----------|-------------------------------------------------------------------------------------------------|
|                           |          | G                                                                                               |
| 5'-BamHI- <i>hubP</i>     | o3771    | CGGGGATCCCCAACGACTCCTGCTGCCAGTGGC                                                               |
| 3'-750 NheI- <i>hubP</i>  | o3773    | GGCGCTAGCGAAGCTTCTTCCGCTTTACGGCGC                                                               |
| 3'-1500 NheI- <i>hubP</i> | o3774    | GGCGCTAGCGCCAGCTCATCATTGAGTAGCGTATCC                                                            |
| 3'-3000 NheI- <i>hubP</i> | o3830    | GGCGCTAGCACAATTCAGAAGGCGTACTTACTGCCATACCCGA<br>GCGGAATCTTATTAAGCTCGGTAAAGGCTTCTTCCTCGGCTGG<br>C |
| Swbeg                     | o1897    | CCGTCACAGGTATTTATTCGGCG                                                                         |
| Swend                     | o1898    | CCTCACTAAAGGGAACAAAAGCTG                                                                        |
| DAP-A-R                   | o1962    | GTGGTGCCAACAGAAACGATCGC                                                                         |
| Verif- <i>lbd-attR</i>    | o361     | GGCAAGCGCCTCGATTACTGCGATGTTTAG                                                                  |
| <i>finDAPrev</i>          | o3725bis | GGCCTTTCGTTTTATCTGTTGTTTGTCGG                                                                   |

**Synthetic fragments used in this study**
